# Supplementary material
Source: Copernicus journal article supplement (doi:10.5194/egusphere-2026-3034)
Supplement: Supplementary file 1 [file egusphere-2026-3034-supplement.pdf]

1  
2  
3  
4  
5  
6  
7  
8  
9  
10  
11  
12  
13  
14  
15  
16

Supporting Information for

**Long-term Strengthening of the CO<sub>2</sub> Sink and Spatiotemporal pCO<sub>2</sub> dynamics in the northern Gulf of Mexico: Insights from a 22-year Satellite-based Machine Learning Reconstruction**

Zong-Pei Jiang<sup>1\*</sup>, Fengqin Chen<sup>1</sup>, Wenzhao Liang<sup>2</sup>, Kailang Ma<sup>1</sup>, Chenfeng Le<sup>1</sup>, Yiwen Pan<sup>1</sup>, Wei-Jun Cai<sup>3\*</sup>

<sup>1</sup>Ocean College, Zhejiang University, Zhoushan, China,

<sup>2</sup>School of Geography and Planning, Sun Yat-sen University, Guangzhou, China

<sup>3</sup>School of Marine Science and Policy, University of Delaware, Newark, DE, USA

Corresponding author: Z.-P. Jiang ([zpjiang@zju.edu.cn](mailto:zpjiang@zju.edu.cn)); W.-J. Cai ([wcai@udel.edu](mailto:wcai@udel.edu))

**Contents of this file**

Figures S1 to S3

Tables S1 to S3

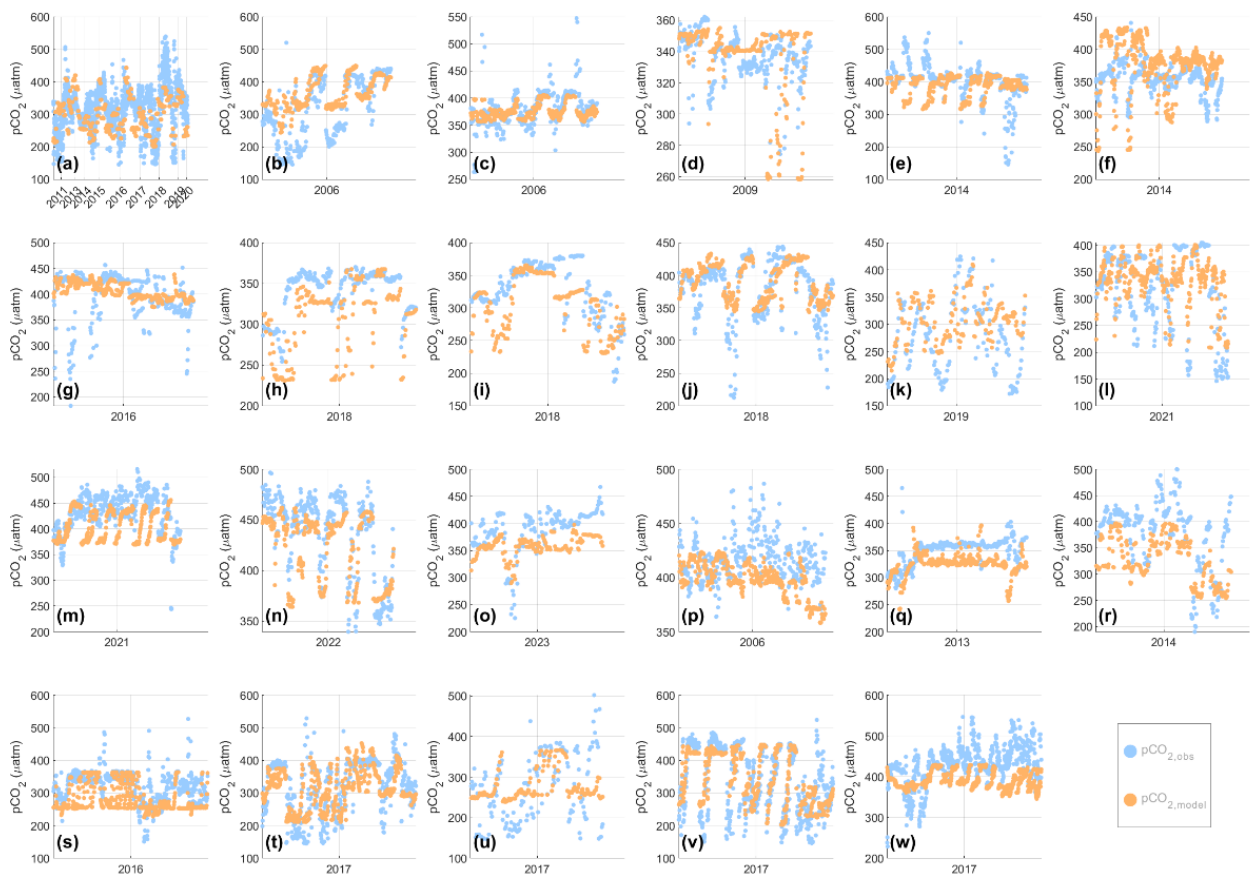

18 **Figure S1.** Independent verification of sea surface  $p\text{CO}_2$  from the season-specific random forest  
 19 model ( $p\text{CO}_{2,\text{model}}$ ) against underway measurements ( $p\text{CO}_{2,\text{obs}}$ ) from individual cruises.

20  
 21

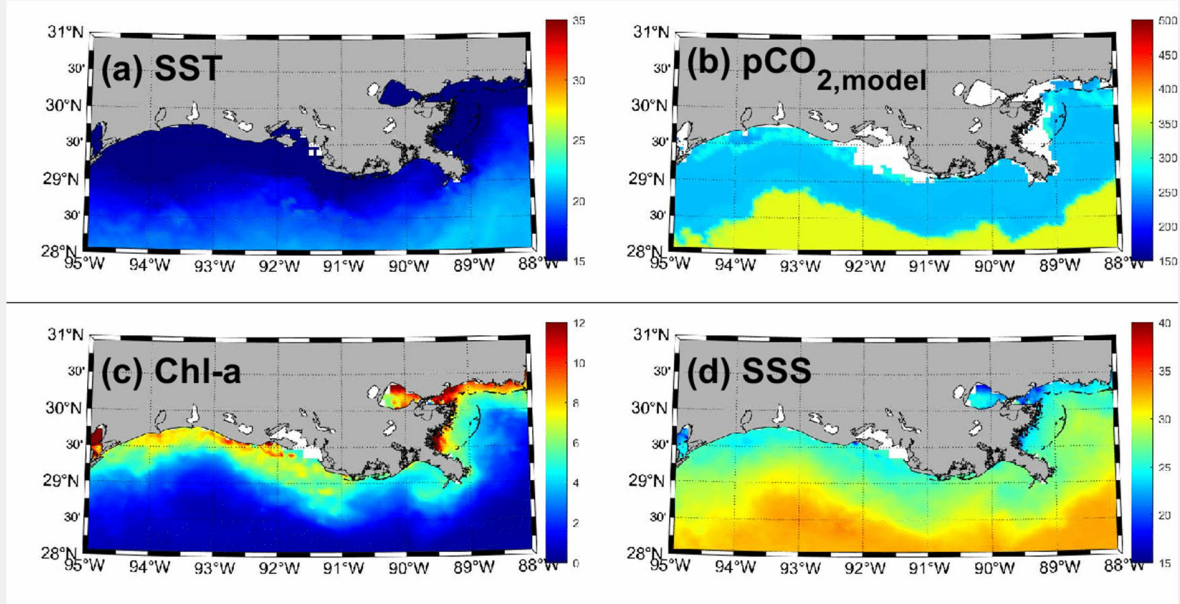

2003-1

23 **Figure S2.** Animated monthly variations of (a) sea surface temperature (SST), (b) sea surface  $pCO_2$   
 24 from the season-specific random forest model ( $pCO_{2,model}$ ), (c) chlorophyll a (Chl-a), and (d) salinity  
 25 in the northern Gulf of Mexico over the period 2003–2024.  
 26

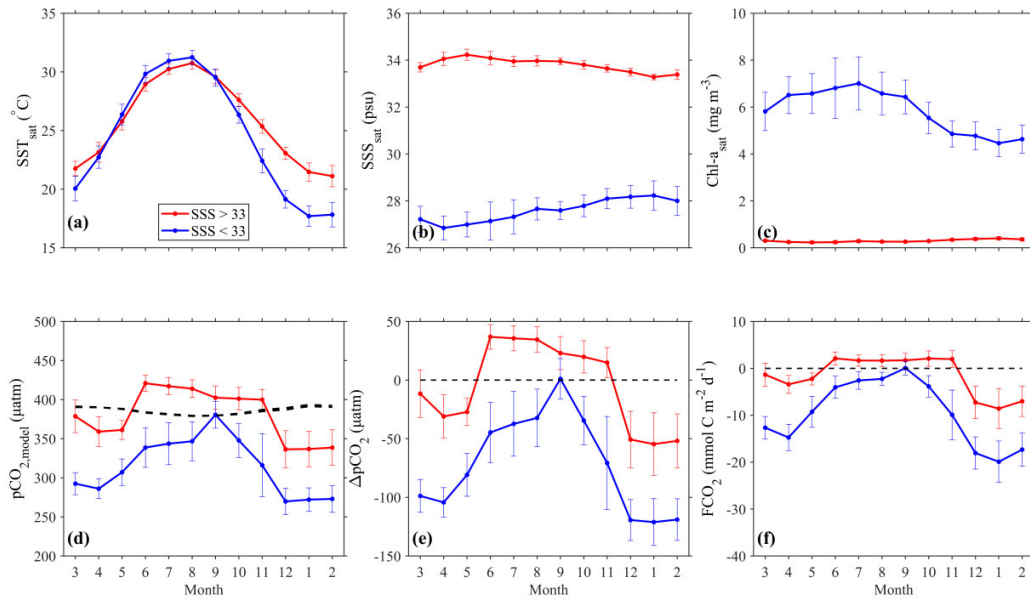

27  
28  
29  
30  
31  
32  
33  
34  
35  
36  
37

**Figure S3.** Seasonal variations of key surface water variables in the river-influenced coastal water (SSS<33, blue solid lines) and the open Gulf water (SSS>33, red solid lines) in the northern Gulf of Mexico: satellite-derived (a) sea surface temperature ( $SST_{sat}$ ), (b) salinity ( $SSS_{sat}$ ), and (c) chlorophyll a ( $Chl-a_{sat}$ ); (d) sea surface  $pCO_2$  from the season-specific random forest model ( $pCO_{2,model}$ ); (e) air-sea  $pCO_2$  difference ( $\Delta pCO_2$ , seawater minus atmosphere); (f) sea-to-air  $CO_2$  flux ( $F_{CO_2}$ ), where negative values refer to oceanic  $CO_2$  uptake. Solid points represent the climatological regional monthly averages, with error bars indicating the standard deviation arising from spatial heterogeneity. The black dotted line in panel (d) shows the atmospheric  $pCO_2$ . The black dashed lines in panels (e) and (f) mark the zero reference ( $pCO_2$  equilibrium and zero flux, respectively).

**Table S1.** Summary statistics of environmental variables used for model training.

| Time period<br>data number                       | Full-season<br>18648 |               | Spring<br>3649     |               | Summer<br>4291     |               | Autumn<br>7966     |               | Winter<br>2742     |               |
|--------------------------------------------------|----------------------|---------------|--------------------|---------------|--------------------|---------------|--------------------|---------------|--------------------|---------------|
| Statistics<br>Variables                          | Mean $\pm$ SD        | Range         | Mean $\pm$ SD      | Range         | Mean $\pm$ SD      | Range         | Mean $\pm$ SD      | Range         | Mean $\pm$ SD      | Range         |
| $p\text{CO}_{2,\text{obs}}$ ( $\mu\text{atm}$ )  | 358.25 $\pm$ 65.67   | 145.44-549.93 | 333.76 $\pm$ 68.19 | 145.10-542.15 | 352.99 $\pm$ 81.90 | 145.44-549.21 | 384.59 $\pm$ 48.13 | 145.97-549.93 | 322.52 $\pm$ 42.27 | 146.86-526.98 |
| Chl- $a_{\text{sat}}$ ( $\text{mg}/\text{m}^3$ ) | 0.18 $\pm$ 0.05      | 0.05-0.75     | 0.16 $\pm$ 0.03    | 0.05-0.35     | 0.17 $\pm$ 0.04    | 0.06-0.32     | 0.18 $\pm$ 0.06    | 0.05-0.75     | 0.17 $\pm$ 0.04    | 0.09-0.39     |
| SST $_{\text{sat}}$ ( $^{\circ}\text{C}$ )       | 26.26 $\pm$ 4.10     | 20.65-29.43   | 23.40 $\pm$ 2.54   | 24.48-29.43   | 29.78 $\pm$ 1.05   | 22.63-28.55   | 27.97 $\pm$ 2.19   | 20.65-28.08   | 19.61 $\pm$ 2.62   | 21.51-27.98   |
| SSS $_{\text{sat}}$                              | 31.65 $\pm$ 4.84     | 10.91-38.13   | 31.36 $\pm$ 5.61   | 18.54-36.63   | 29.54 $\pm$ 5.40   | 4.68-38.13    | 32.40 $\pm$ 3.77   | 22.33-36.62   | 33.17 $\pm$ 4.39   | 17.73-35.62   |
| $p\text{CO}_{2,\text{air}}$ ( $\mu\text{atm}$ )  | 386.90 $\pm$ 11.16   | 361.87-408.58 | 394.30 $\pm$ 8.02  | 375.13-408.58 | 382.42 $\pm$ 10.55 | 363.93-405.53 | 383.72 $\pm$ 11.03 | 357.13-401.64 | 393.27 $\pm$ 7.68  | 377.47-408.25 |

**Table S2.** Performance comparison between the full-season model and the season-specific model. The evaluation metrics include coefficient of determination ( $R^2$ ), root mean square error (RMSE), mean absolute error (MAE), mean relative error (MRE), and mean ratio (MR).

|                          | Full-season model |        | Season-specific model |        |        |         |
|--------------------------|-------------------|--------|-----------------------|--------|--------|---------|
|                          |                   | Spring | Summer                | Autumn | Winter | Overall |
| $R^2$                    | 0.65              | 0.76   | 0.82                  | 0.78   | 0.70   | 0.81    |
| RMSE ( $\mu\text{atm}$ ) | 40.80             | 32.40  | 34.38                 | 22.31  | 22.12  | 27.60   |
| MAD ( $\mu\text{atm}$ )  | 21.42             | 19.81  | 22.93                 | 13.54  | 12.20  | 16.73   |
| MRD (%)                  | 1.58              | 1.25   | 1.66                  | 0.52   | 0.48   | 0.92    |
| MR                       | 1.02              | 1.01   | 1.02                  | 1.00   | 1.00   | 1.00    |

**Table S3.** Climatological averages (referenced to year 2013) and decadal changing rates of environmental variables in the northern Gulf of Mexico. Asterisks indicate significance levels: \*\* $p < 0.001$ , \* $p < 0.05$ .

| Variables                                                   | Climatological average |              |              |              |              | Decadal rate |
|-------------------------------------------------------------|------------------------|--------------|--------------|--------------|--------------|--------------|
|                                                             | Annual                 | Spring       | Summer       | Autumn       | Winter       |              |
| SST (°C)                                                    | 25.09±1.52             | 23.73±1.88   | 31.22±1.61   | 26.41±1.49   | 18.76±2.60   | 0.05**       |
| SSS                                                         | 28.47±4.86             | 28.57±4.7    | 28.50±4.45   | 29.09±4.98   | 28.73±4.37   | -0.01        |
| Chl-a (mg/m <sup>3</sup> )                                  | 5.47±6.81              | 5.24±5.96    | 6.01±7.51    | 4.83±7.24    | 4.51±5.53    | 0.04*        |
| Wind speed (m/s)                                            | 4.82±1.67              | 5.00±1.49    | 3.72±1.22    | 4.94±1.74    | 5.60±1.81    | 0.003        |
| Discharge (*10 <sup>3</sup> m <sup>3</sup> /s)              | 24.68±5.87             | 28.36±7.98   | 23.85±8.01   | 16.33±4.17   | 22.92±9.05   | 0.30         |
| TN (10 <sup>3</sup> tons)                                   | 35.28±8.62             | 48.35±12.53  | 33.74±15.71  | 15.11±9.67   | 33.75±11.29  | -0.07        |
| $p\text{CO}_{2,\text{air}}$ (µatm)                          | 383.01 ± ±1.51         | 386.02±0.61  | 377.87±0.80  | 379.92±0.82  | 387.28±1.36  | 2.13**       |
| $p\text{CO}_2$ (µatm)                                       | 325.54±38.86           | 306.80±50.76 | 351.78±52.43 | 357.59±29.32 | 285.77±36.92 | 0.5*         |
| $F_{\text{CO}_2}$ (mmol C m <sup>-2</sup> d <sup>-1</sup> ) | -7.55±5.03             | -9.57±6.91   | -2.02±3.43   | -3.04±3.65   | -14.88±6.03  | -0.41**      |
